# Supplementary material for: Pyogenic study: Effect of COVID-19 pandemic on the incidence, clinical picture and outcome of Streptococcus pyogenes infection requiring intensive care admission
Source: Research Square preprint supplement (doi:10.21203/rs.3.rs-8158049/v1), 2025-12-02
Supplement: Supplementary file 1 [file 17065ec3c412f69ea3eaa22e.docx]

1. **Univariate analysis**

**Table 1 - Mortality univariate analysis**

| Section | Variable | Alive at 30 days | | P value |
| --- | --- | --- | --- | --- |
| Demographic and baseline characteristics |  | Yes (n = 152) | No (n = 43) |  |
|  | Age, years | 50.5 [42.0-68.0] | 64.0 [53.5-71.5] | 0,006 |
|  | Male sex, n (%) | 90 (59.2%) | 25 (58.1%) | 1 |
| Comorbidities |  |  |  | 0 |
|  | Hypertension, n (%) | 50 (32.9%) | 23 (53.5%) | 0,022 |
|  | Diabetes mellitus, n (%) | 29 (19.1%) | 11 (25.6%) | 0,473 |
|  | Dyslipidemia, n (%) | 42 (27.6%) | 8 (18.6%) | 0,318 |
|  | Ischemic heart disease, n (%) | 10 (6.6%) | 2 (4.7%) | 1 |
|  | Heart failure, n (%) | 4 (2.6%) | 7 (16.3%) | 0,003 |
|  | Chronic kidney disease, n (%) | 15 (9.9%) | 5 (11.6%) | 0,777 |
|  | Liver cirrhosis, n (%) | 2 (1.3%) | 2 (4.7%) | 0,212 |
|  | Alcohol use disorder, n (%) | 11 (7.2%) | 7 (16.3%) | 0,08 |
|  | COPD or asthma, n (%) | 17 (11.2%) | 3 (7.0%) | 0,574 |
|  | Neutropenia, n (%) | 2 (1.3%) | 2 (4.7%) | 0,212 |
|  | Solid organ transplant, n (%) | 3 (2.0%) | 0 (0.0%) | 1 |
|  | Cancer, n (%) | 11 (7.2%) | 6 (14.0%) | 0,217 |
|  | HIV/AIDS, n (%) | 1 (0.7%) | 0 (0.0%) | 1 |
|  | Pregnant or puerperal, n (%) | 6 (3.9%) | 0 (0.0%) | 0,342 |
|  | Charlson comorbidity index | 1.00 [0.00-4.00] | 3.00 [1.00-4.00] | 0,044 |
| Pre-admission factors |  |  |  | 0 |
|  | NSAID use within 1 week, n (%) | 32 (21.1%) | 11 (25.6%) | 0,671 |
|  | History of COVID-19 infection, n (%) | 14 (9.2%) | 5 (11.6%) | 0,574 |
| Severity scores and admission data |  |  |  | 0 |
|  | SAPS III score | 58.5 [47.8-71.2] | 80.0 [72.0-89.0] | <0.001 |
|  | SOFA score | 7.00 [5.00-10.0] | 11.0 [8.00-14.0] | <0.002 |
|  | Leukocytes on admission, /mm³ | 12700 [5485-18315] | 4800 [2135-9390] | <0.003 |
|  | NLR on admission | 19.1 [9.25-47.0] | 14.0 [7.52-32.1] | 0,075 |
|  | Platelets on admission, /mm³ | 158500 [109750-228500] | 115000 [87500-175500] | 0,008 |
|  | CRP on admission, mg/L | 249 [38.2-345] | 204 [43.8-330] | 0,422 |
|  | PCT on admission, ng/mL | 26.5 [10.3-64.5] | 64.3 [18.7-100] | 0,012 |
|  | Coagulopathy on admission, n (%) | 77 (50.7%) | 28 (65.1%) | 0,132 |
| Clinical variables |  |  |  |  |
|  | ARDS (Berlin definition), n (%) | 56 (36.8%) | 25 (58.1%) | 0,02 |
|  | Prone positioning, n (%) | 21 (13.8%) | 13 (30.2%) | 0,023 |
|  | Duration of mechanical ventilation, days | 5.50 [0.00-14.0] | 2.00 [1.00-10.5] | 0,468 |
|  | VV ECMO, n (%) | 6 (3.9%) | 2 (4.7%) | 1 |
|  | VA ECMO, n (%) | 5 (3.3%) | 4 (9.3%) | 0,11 |
|  | Any ECMO, n (%) | 10 (6.6%) | 5 (11.6%) | 0,329 |
|  | Acute kidney injury, n (%) | 107 (70.4%) | 39 (90.7%) | 0,012 |
|  | Renal replacement therapy, n (%) | 46 (30.3%) | 26 (60.5%) | 0,001 |
|  | Septic shock, n (%) | 120 (78.9%) | 43 (100%) | 0,002 |
|  | Duration of vasopressors, days | 3.00 [1.00-6.25] | 2.00 [1.00-5.00] | 0,874 |
|  | Streptococcus pyogenes bacteremia, n (%) | 79 (52.0%) | 31 (72.1%) | 0,03 |
|  | Surgical debridement, n (%) | 69 (45.4%) | 13 (30.2%) | 0,109 |
|  | STS criteria fulfilled, n (%) | 74 (48.7%) | 40 (93.0%) | <0.001 |
|  | Pneumonia, n (%) | 56 (36.8%) | 20 (46.5%) | 0,332 |
|  |  |  |  |  |
| Outcomes |  |  |  |  |
|  | ICU length of stay, days | 10.0 [5.00-23.0] | 3.00 [1.00-22.0] | 0,001 |
|  | Pre-COVID period, n (%) | 51 (33.6%) | 16 (37.2%) | 0,792 |
|  | Post-COVID period, n (%) | 101 (66.4%) | 27 (62.8%) | 0,792 |

1. **Multivariate logistic regression**

A binary logistic regression was performed to identify clinical and epidemiological factors independently associated with the post-COVID period.

**Model specification**

The dependent variable was *Pre_Post_COVID* (0 = pre-pandemic, 1 = post-pandemic). Independent variables included pneumonia, Berlin ARDS, ICU length of stay, days of mechanical ventilation, ECMO, and days on vasopressors. Stepwise bidirectional selection based on the Akaike Information Criterion (AIC) was applied to identify the most parsimonious model. The final model included **pneumonia** and **days of mechanical ventilation**, with an AIC of 246.

**Model fit**

Model performance was assessed using the McFadden pseudo-R² (McFadden R² = 0.04). Although low, we considered this value acceptable due to the moderate sample size and non-predictive explanatory objectives. Residual diagnostics and the absence of influential observations supported model adequacy.

**Collinearity assessment**

Multicollinearity was evaluated using the Variance Inflation Factor (VIF). The two variables in the final model showed both VIF = 1.02, indicating no collinearity (VIF < 5).

**Interpretation and robustness**

Odds ratios (OR) and 95% confidence intervals (CI) were computed. Given the explanatory nature of the model, no cross-validation was performed, and overfitting was instead assessed via McFadden’s pseudo-R² and AIC comparison between intermediate models, both supporting adequate model stability and parsimony.

1. **Incidence analysis**

Temporal changes in iGAS incidence were assessed using a Poisson regression model, with calendar years as the independent variable and the annual number of cases as the dependent variable. Since the population at risk remained constant across years, no offset adjustment was required.

Comparison of the residual deviance (33.3) with the residual degrees of freedom (3) yielded a dispersion ratio of 11.1, indicating substantial overdispersion. To evaluate its impact, a quasi-Poisson model was fitted, which maintained identical point estimates (rate ratios) but produced wider confidence intervals and non-significant p-values due to the small number of annual observations. The direction and magnitude of effects were consistent across both models (see table 3 and 4)

Given the descriptive and explanatory objective of the analysis, the Poisson estimates are presented in the main text for interpretative clarity, acknowledging the presence of overdispersion and confirming the robustness of findings through the quasi-Poisson sensitivity analysis.

**Table 2 - Annual incidence, global and infections subtypes**

| Year | Population at risk | Total cases | Annual incidence per 100.000 inhabitants | Mortality | Pneumonia | SSTI |
| --- | --- | --- | --- | --- | --- | --- |
| 2018 | 6.737.930,00 | 31 | 0,46 | 16,1% | 29% | 61,3% |
| 2019 | 6.737.930,00 | 35 | 0,52 | 31,4% | 28,6% | 57,1% |
| 2020 | 6.737.930,00 | 16 | 0,24 | 18,8% | 25% | 75% |
| 2021 | 6.737.930,00 | 6 | 0,09 | 50% | 50% | 50% |
| 2022 | 6.737.930,00 | 28 | 0,42 | 14,3% | 57,1% | 42,9% |
| 2023 | 6.737.930,00 | 79 | 1,17 | 16,5% | 43% | 48,1% |

**Table 3 - Poisson regression model**

| Variable | Estimate (β) | Std. Error | z value | p-value | RR = exp(β) | 95% CI for RR |
| --- | --- | --- | --- | --- | --- | --- |
| Intercept (2018–2020) | 3.3081 | 0.1104 | 29.96 | <0.001 | 27.36 | (22.0–34.0)* |
| 2021 | –1.5163 | 0.4229 | –3.59 | <0.001 | 0.22 | 0.09–0.46 |
| Post-2021 | 0.6716 | 0.1468 | 4.58 | <0.001 | 1.96 | 1.47–2.62 |

**Table 4 - Quasi-Poisson regression model**

| Variable | Estimate (β) | Std. Error | t value | p-value | RR = exp(β) | 95% CI for RR* |
| --- | --- | --- | --- | --- | --- | --- |
| Intercept (2018–2020) | 3.3081 | 0.3587 | 9.22 | 0.0027 | 27.36 | (13.4–55.9) |
| 2021 | –1.5163 | 1.3737 | –1.10 | 0.35 | 0.22 | (0.02–2.41) |
| Post-2021 | 0.6716 | 0.4767 | 1.41 | 0.25 | 1.96 | (0.77–5.00) |
